# Supplementary material for: Comparative study of excretory–secretory proteins released by Schistosoma mansoni-resistant, susceptible and naïve Biomphalaria glabrata
Source: PubMed Central journal article supplement (PMC6744689; doi:10.1186/s13071-019-3708-0), 2019-09-14

Smp\_035460.1

Intensity (%) L Y E F G L R

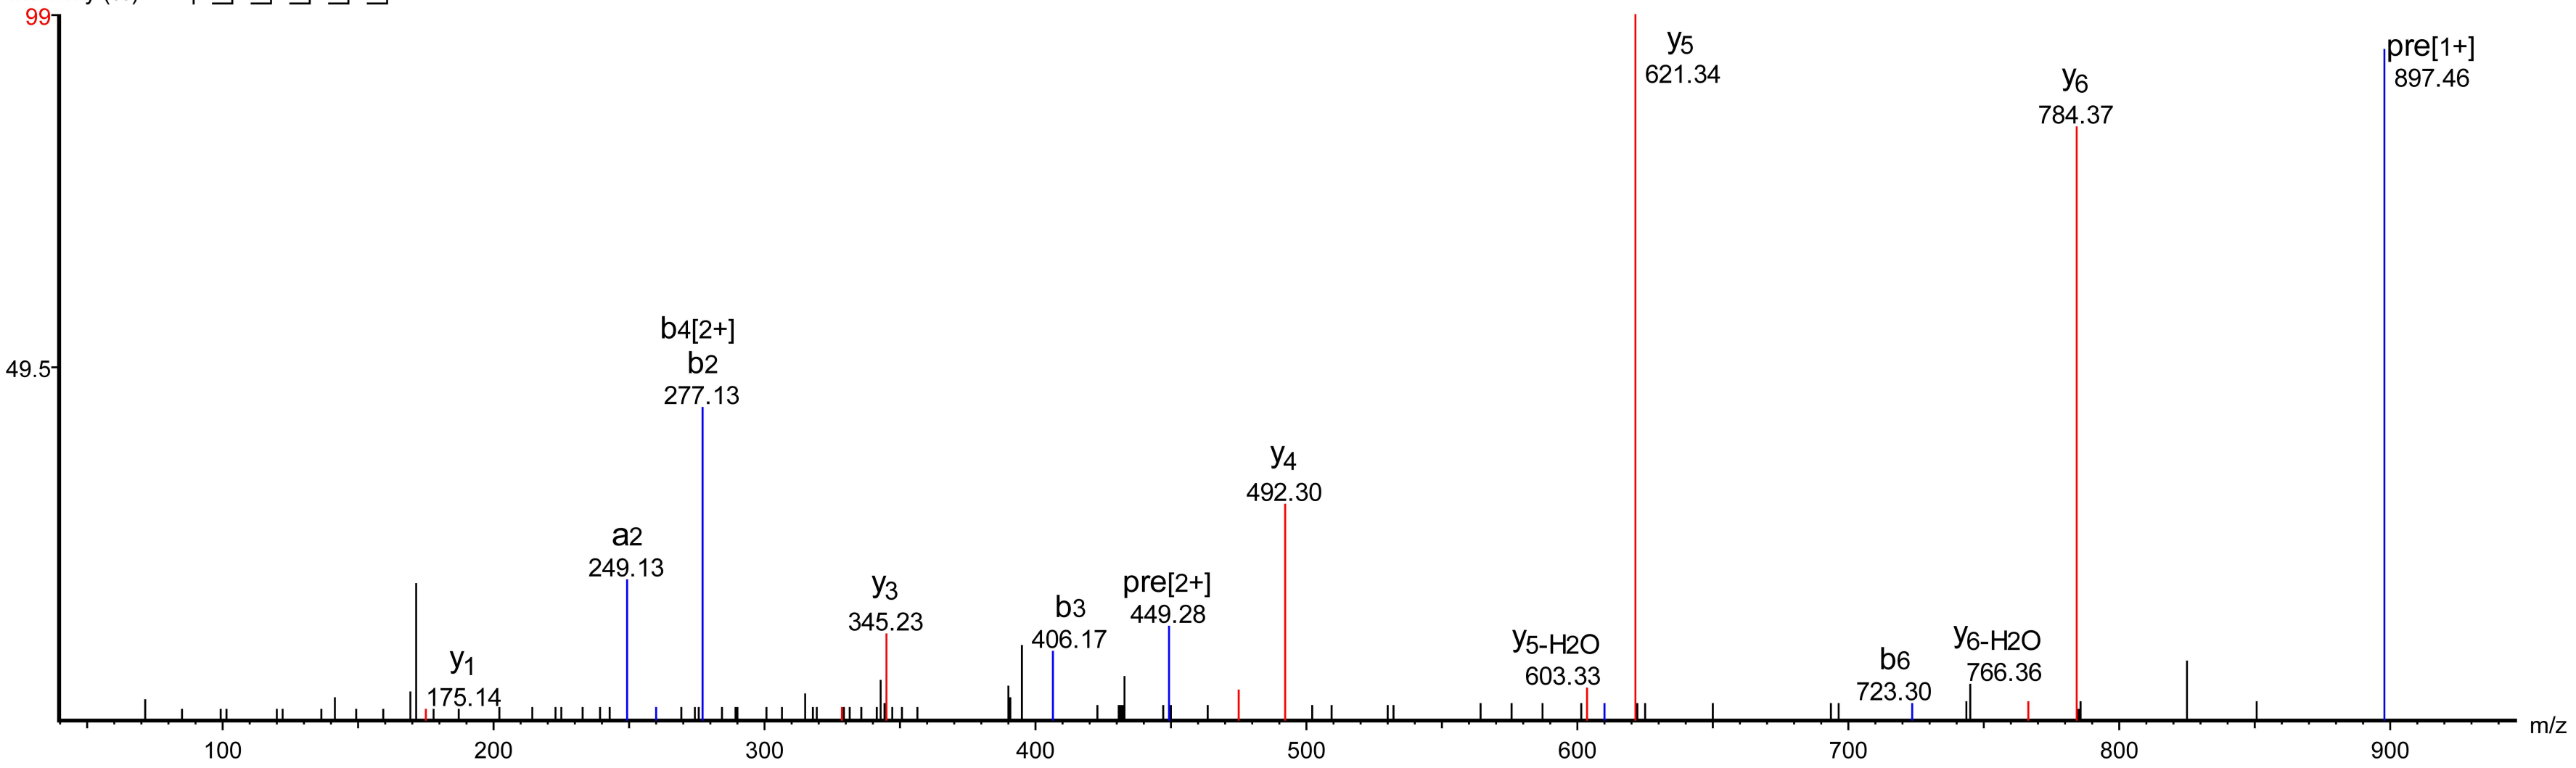

Smp\_056970.4

Intensity (%) **V** **G** **I** **N** **G** **F** **G** **R**

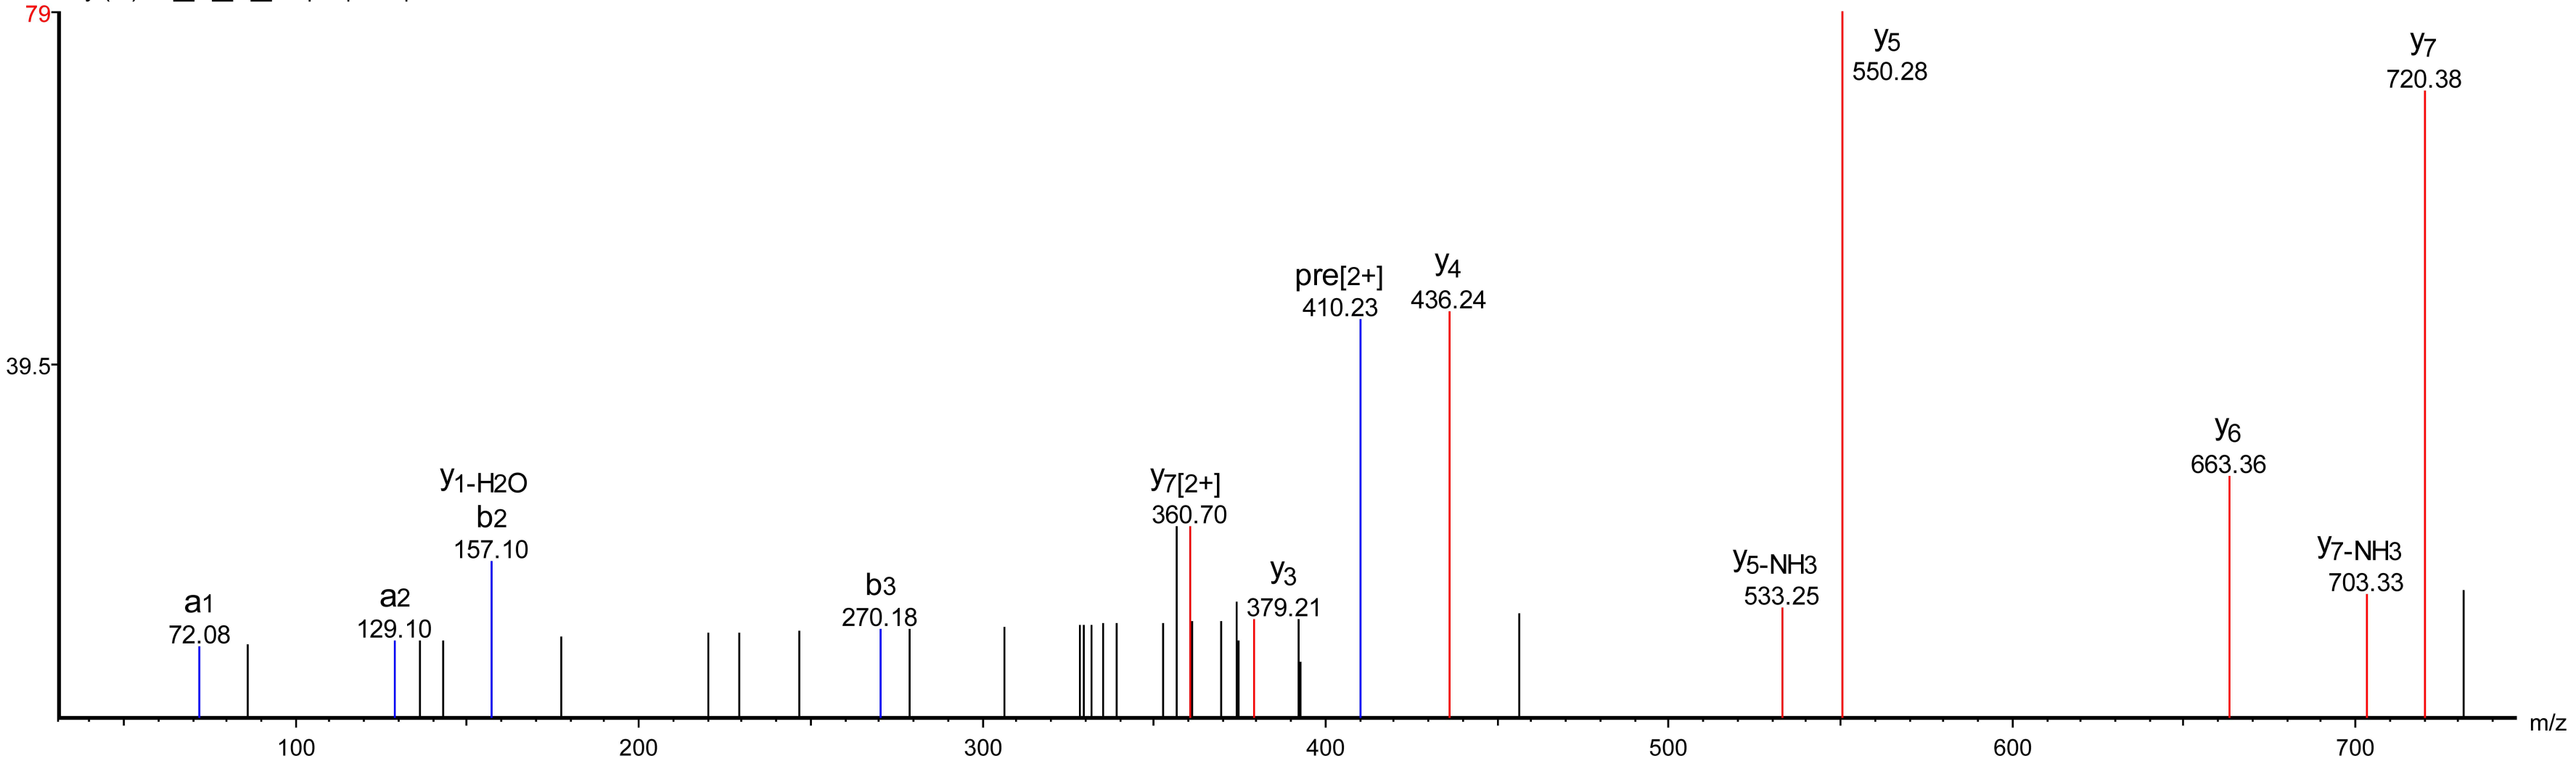

Smp\_088460.1

Intensity (%) **NG** **Q** **H** **AL** **S** **L** **K**

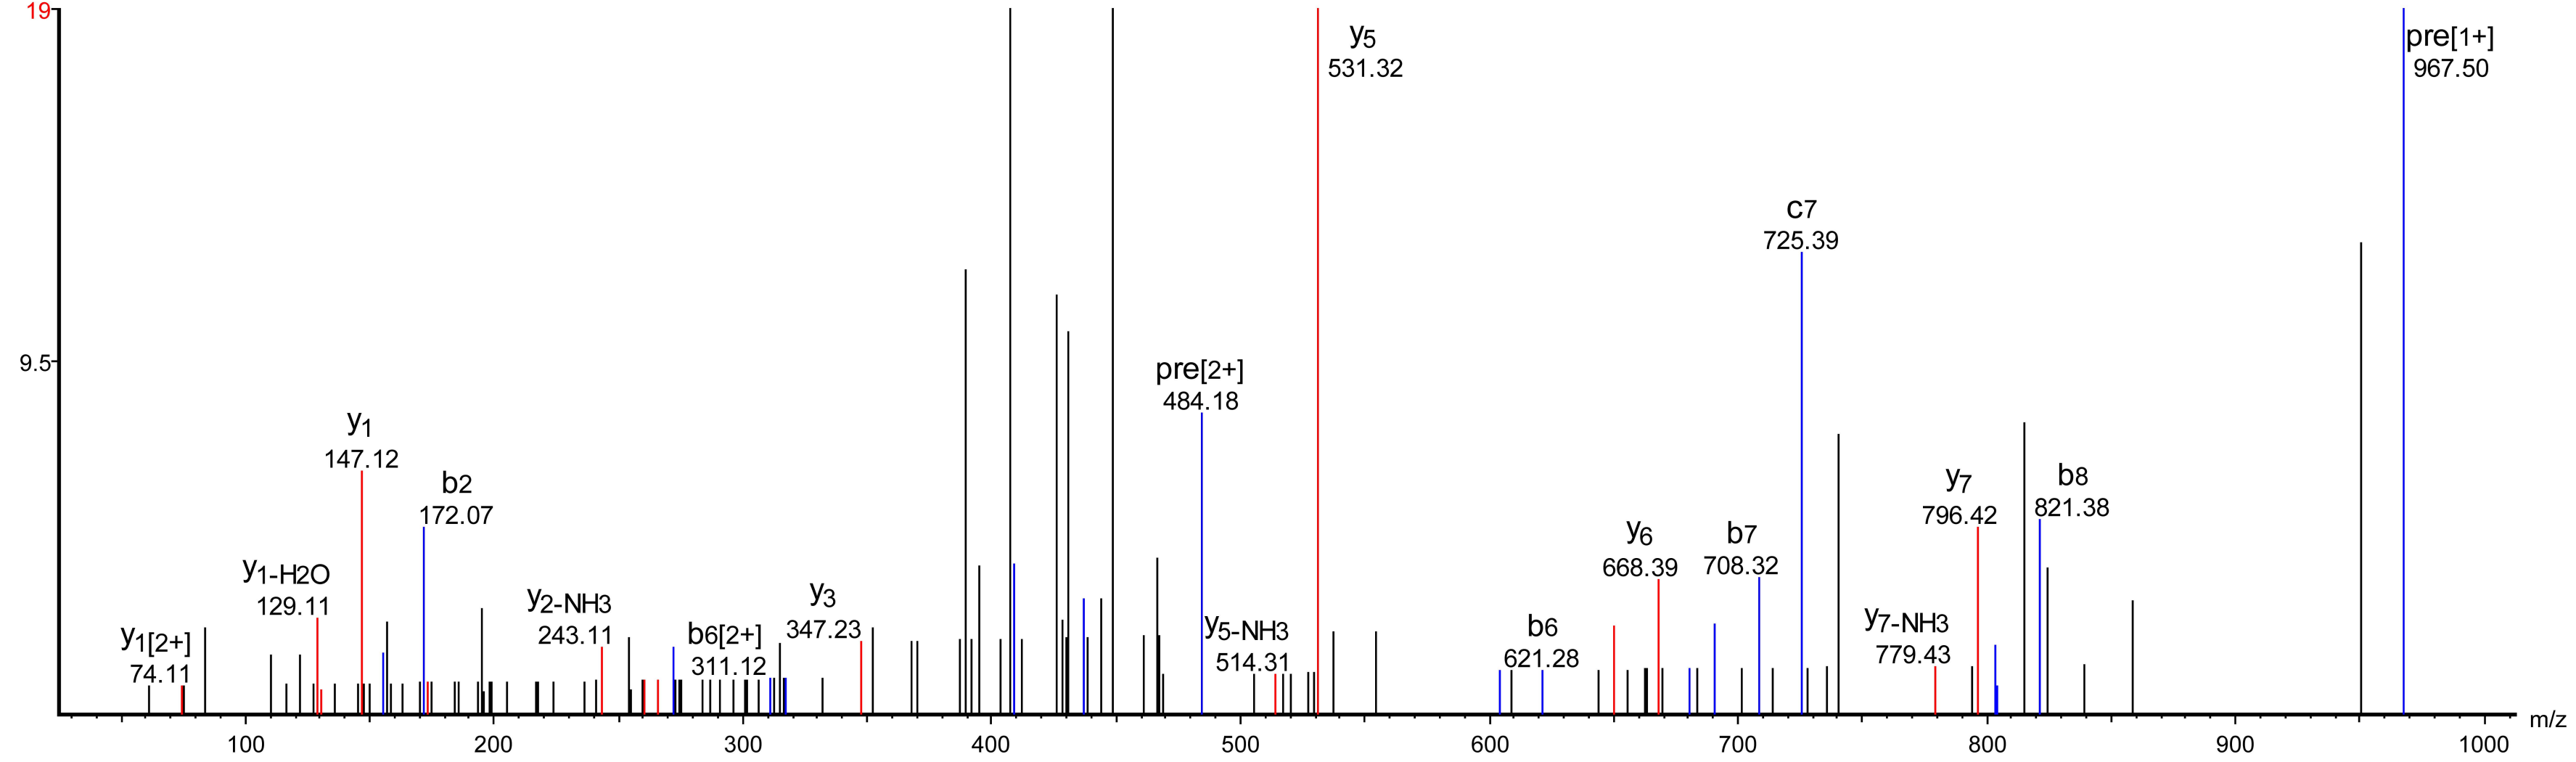

Smp\_093980.1

Intensity (%) T L T S V P L L R

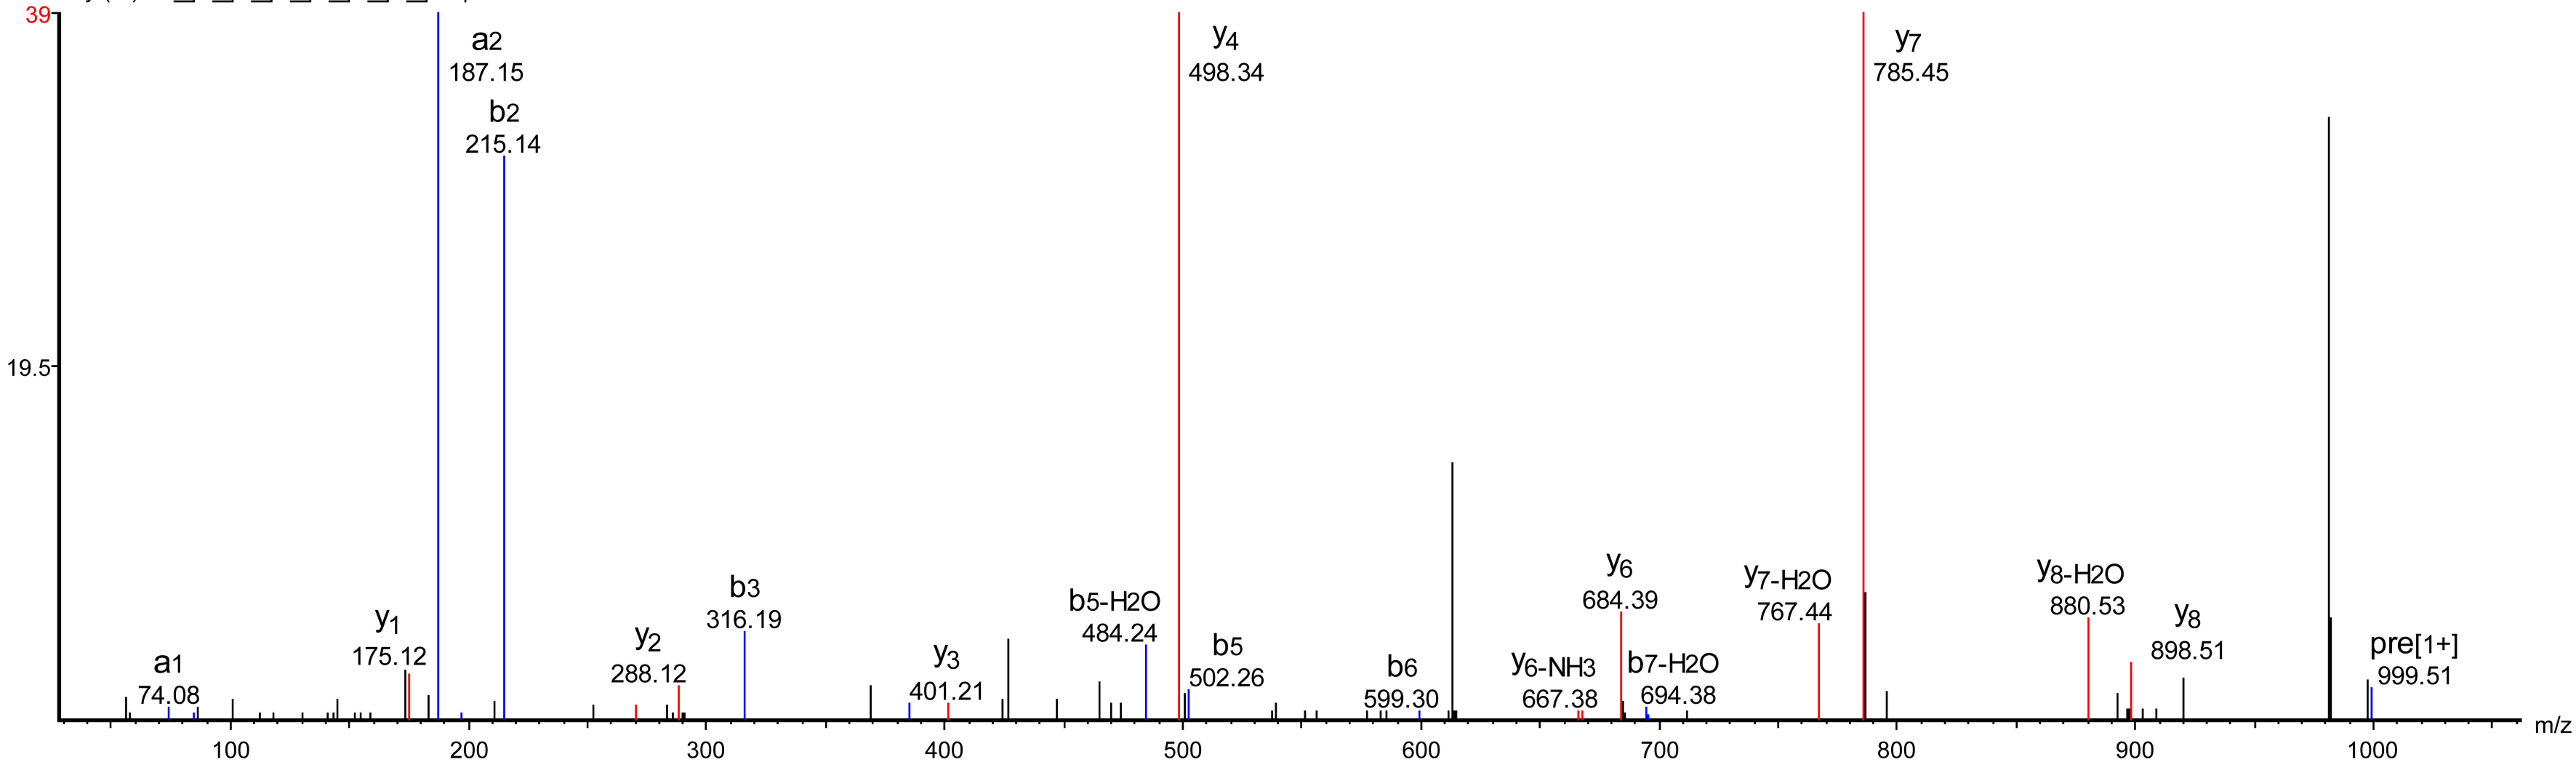

Smp\_130330.1

Intensity (%) **F** **A** **S** **m** **I** **D** **K**

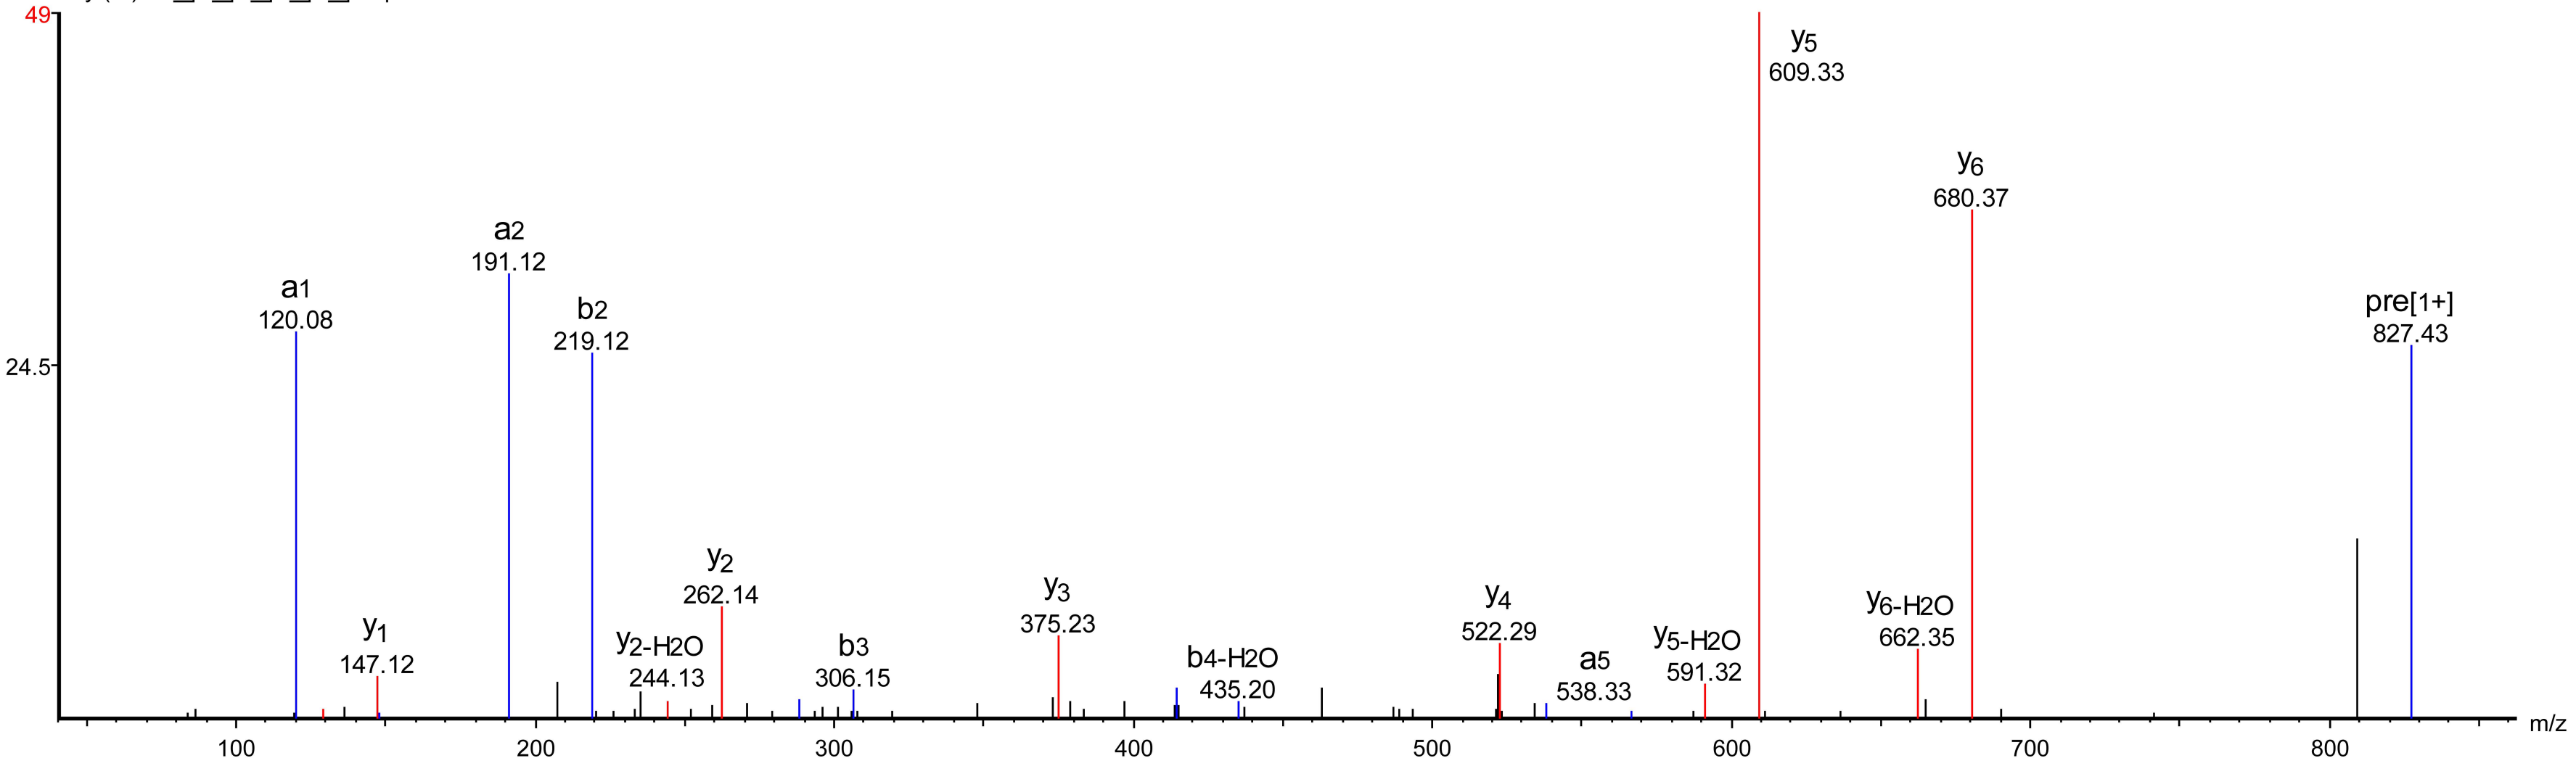

Smp\_142140.1

Intensity (%) **L** **P** **D** **T** **V** **D** **W** **R**

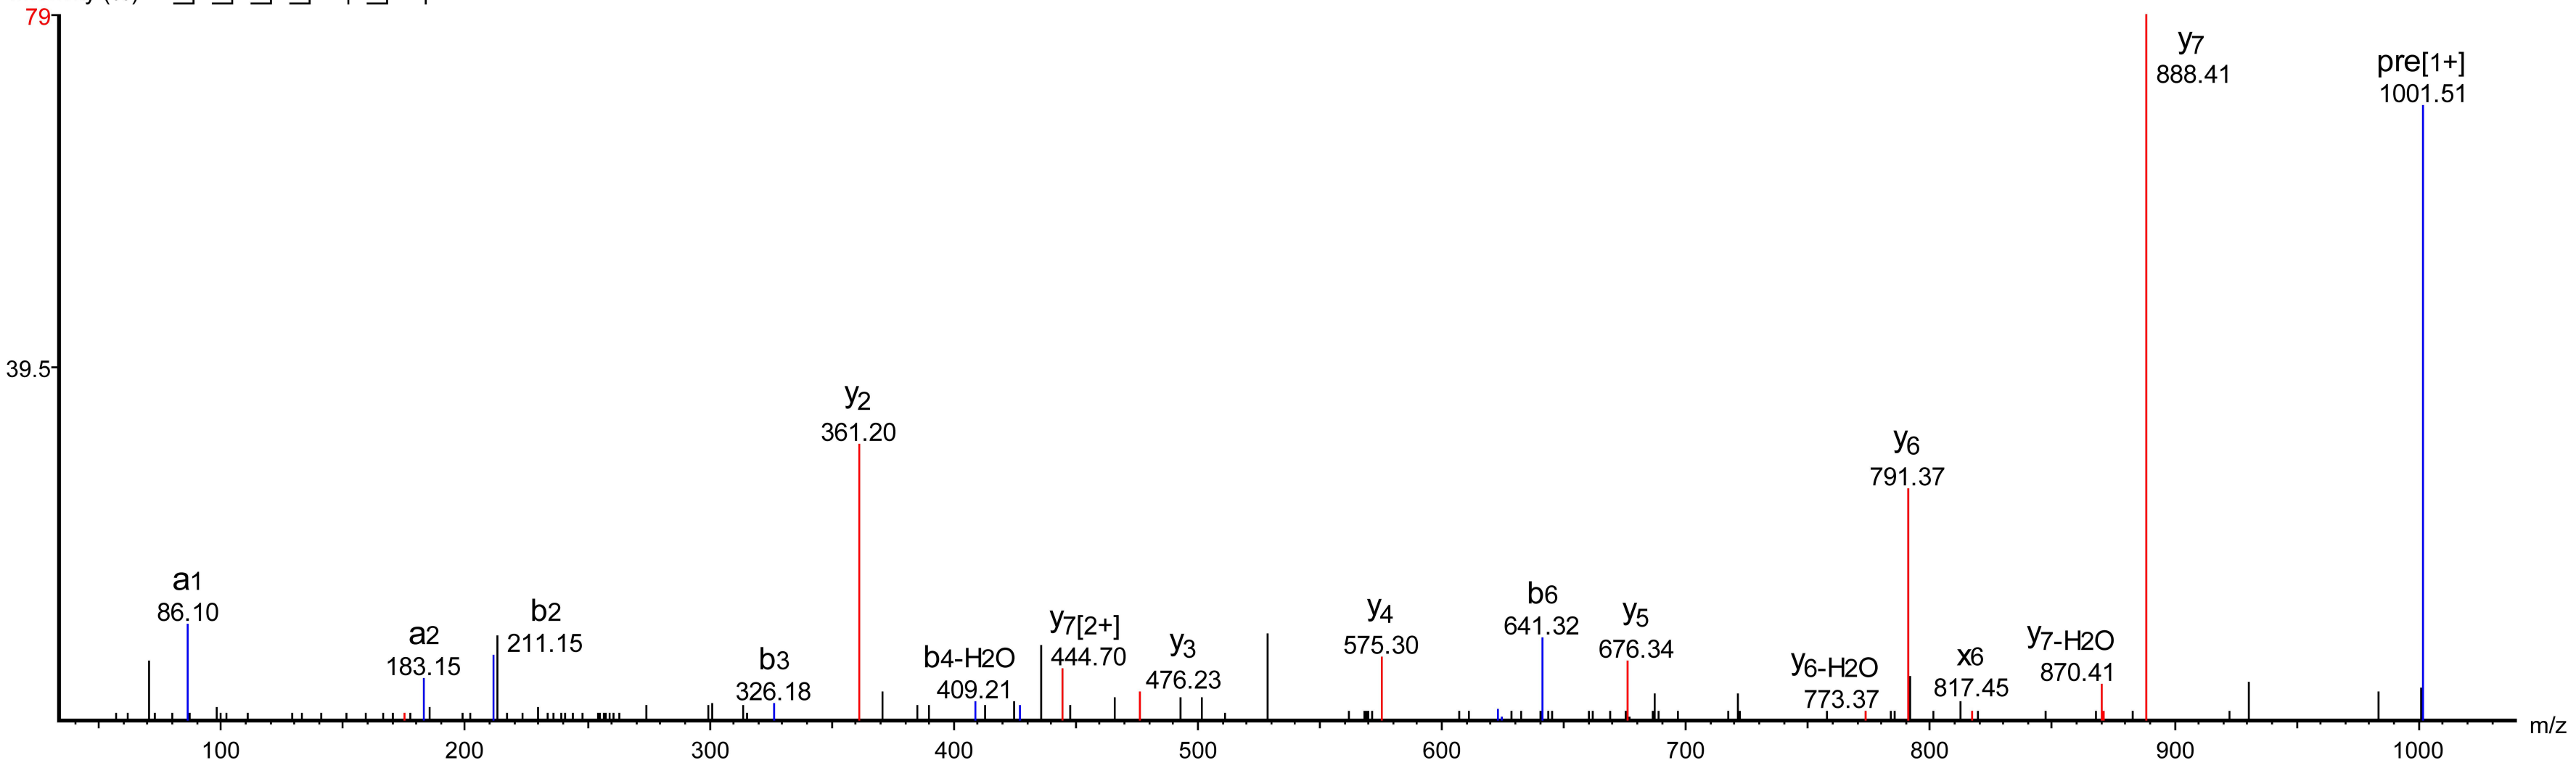

Smp\_179420.1\_1

Intensity (%) **V** **E** **M** **T** **D** **E** **G** **L** **I** **R**

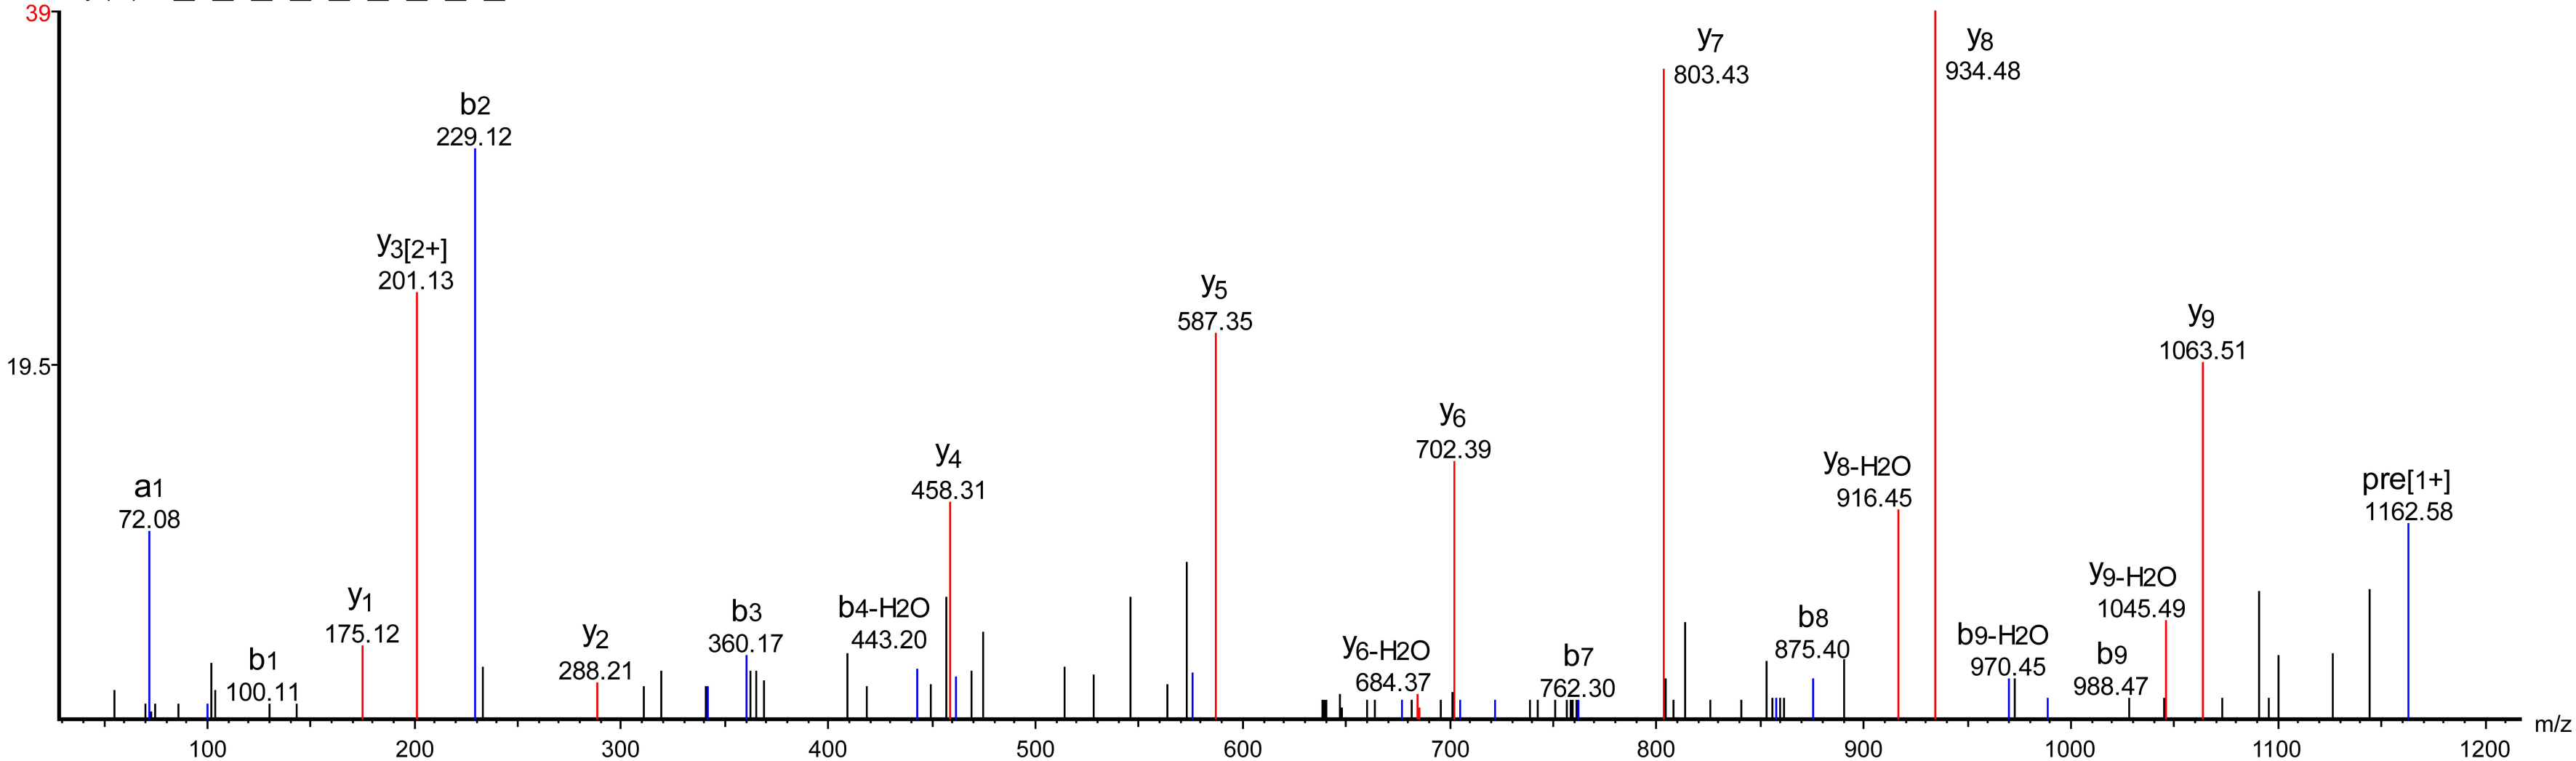

Smp\_179420.1\_2

Intensity (%) **V E m T D E G L I R**

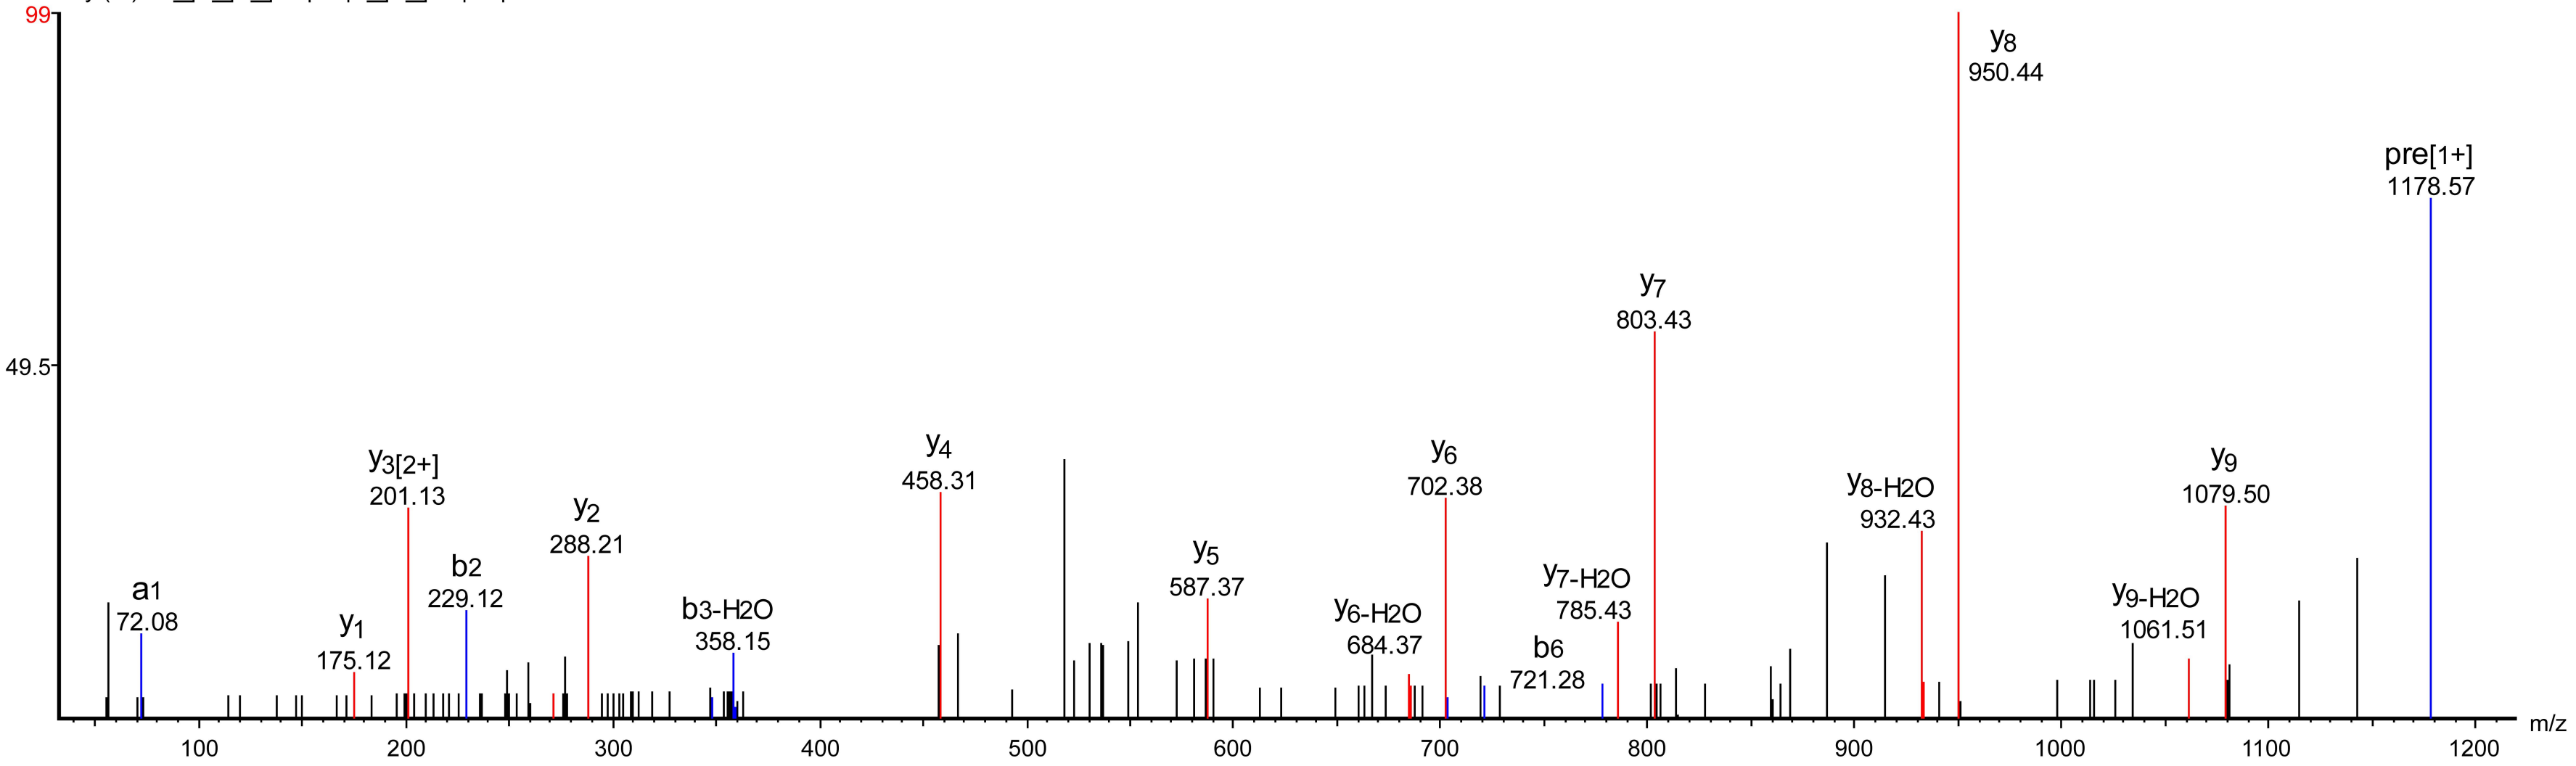



Smp\_179420.1\_3

Intensity (%) **c** **I** **V** **D** **N** **N** **K**

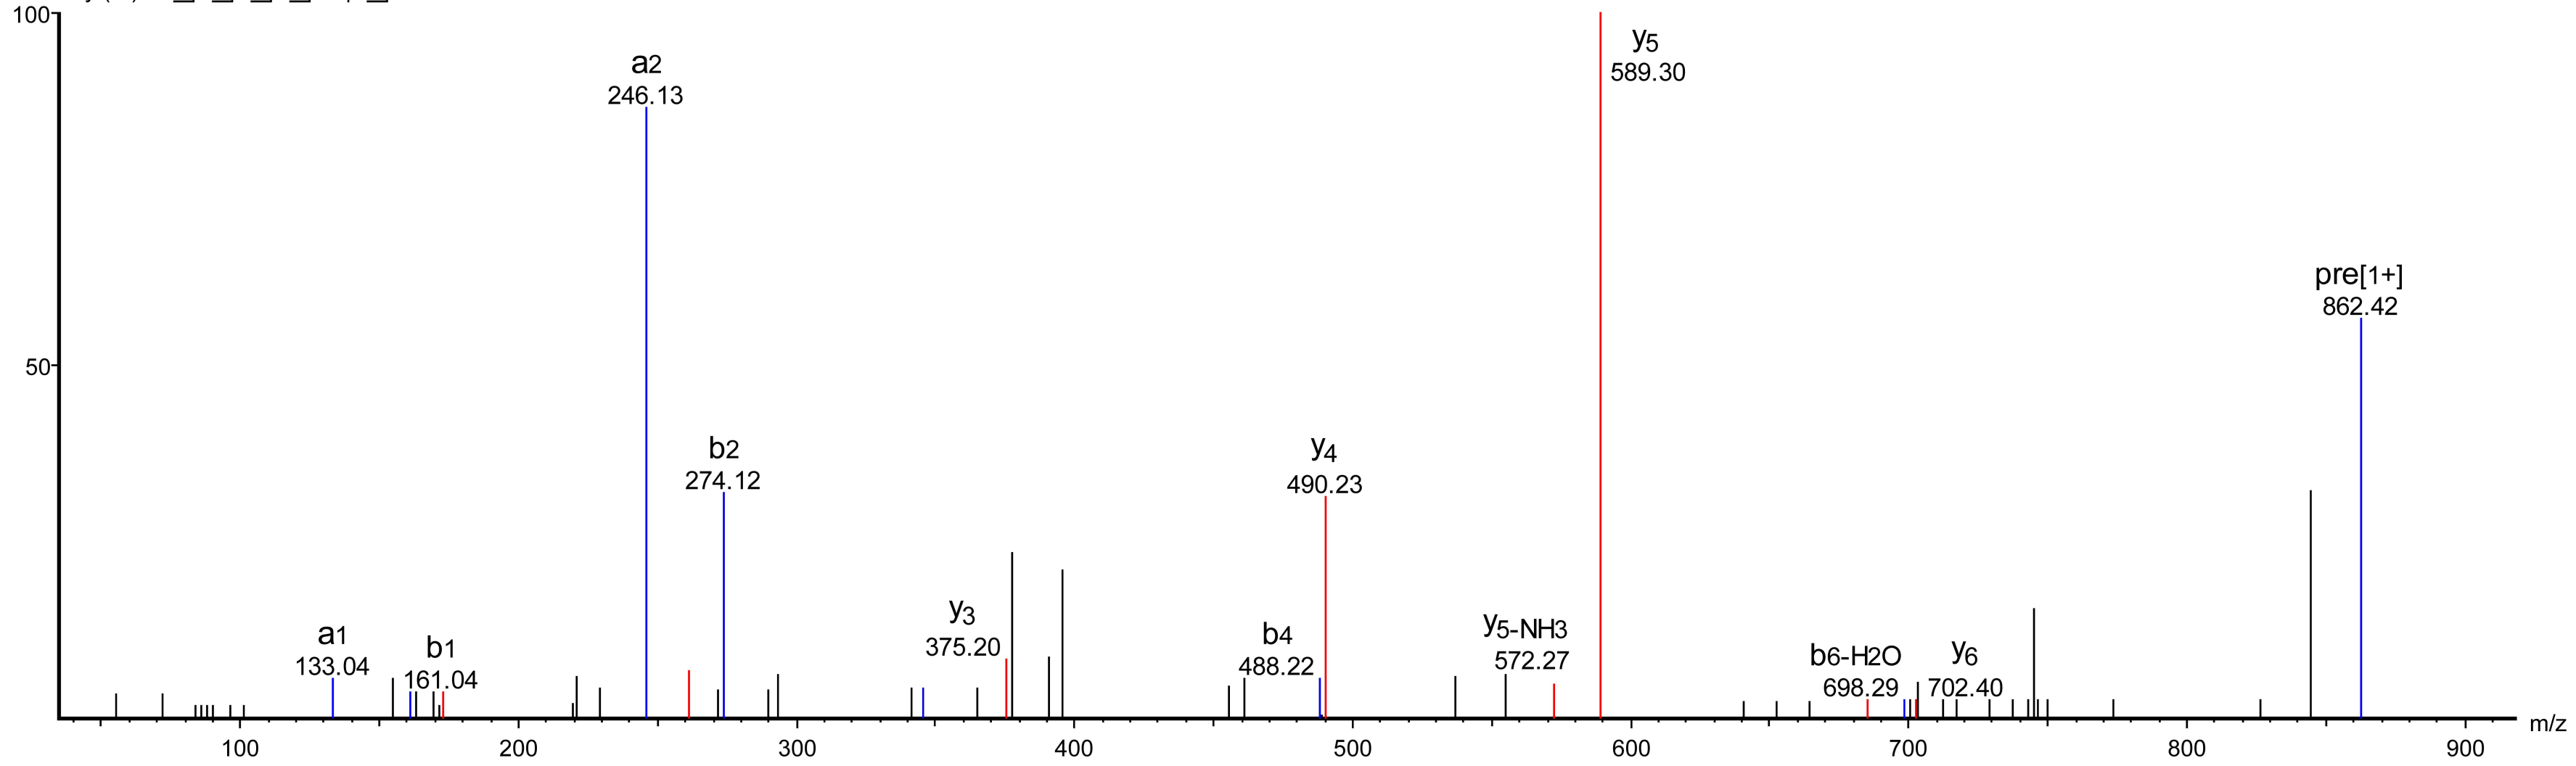

Smp\_193380.1

Intensity (%) **S****G****T****L****V****E****Y****E****V****I****G****K**

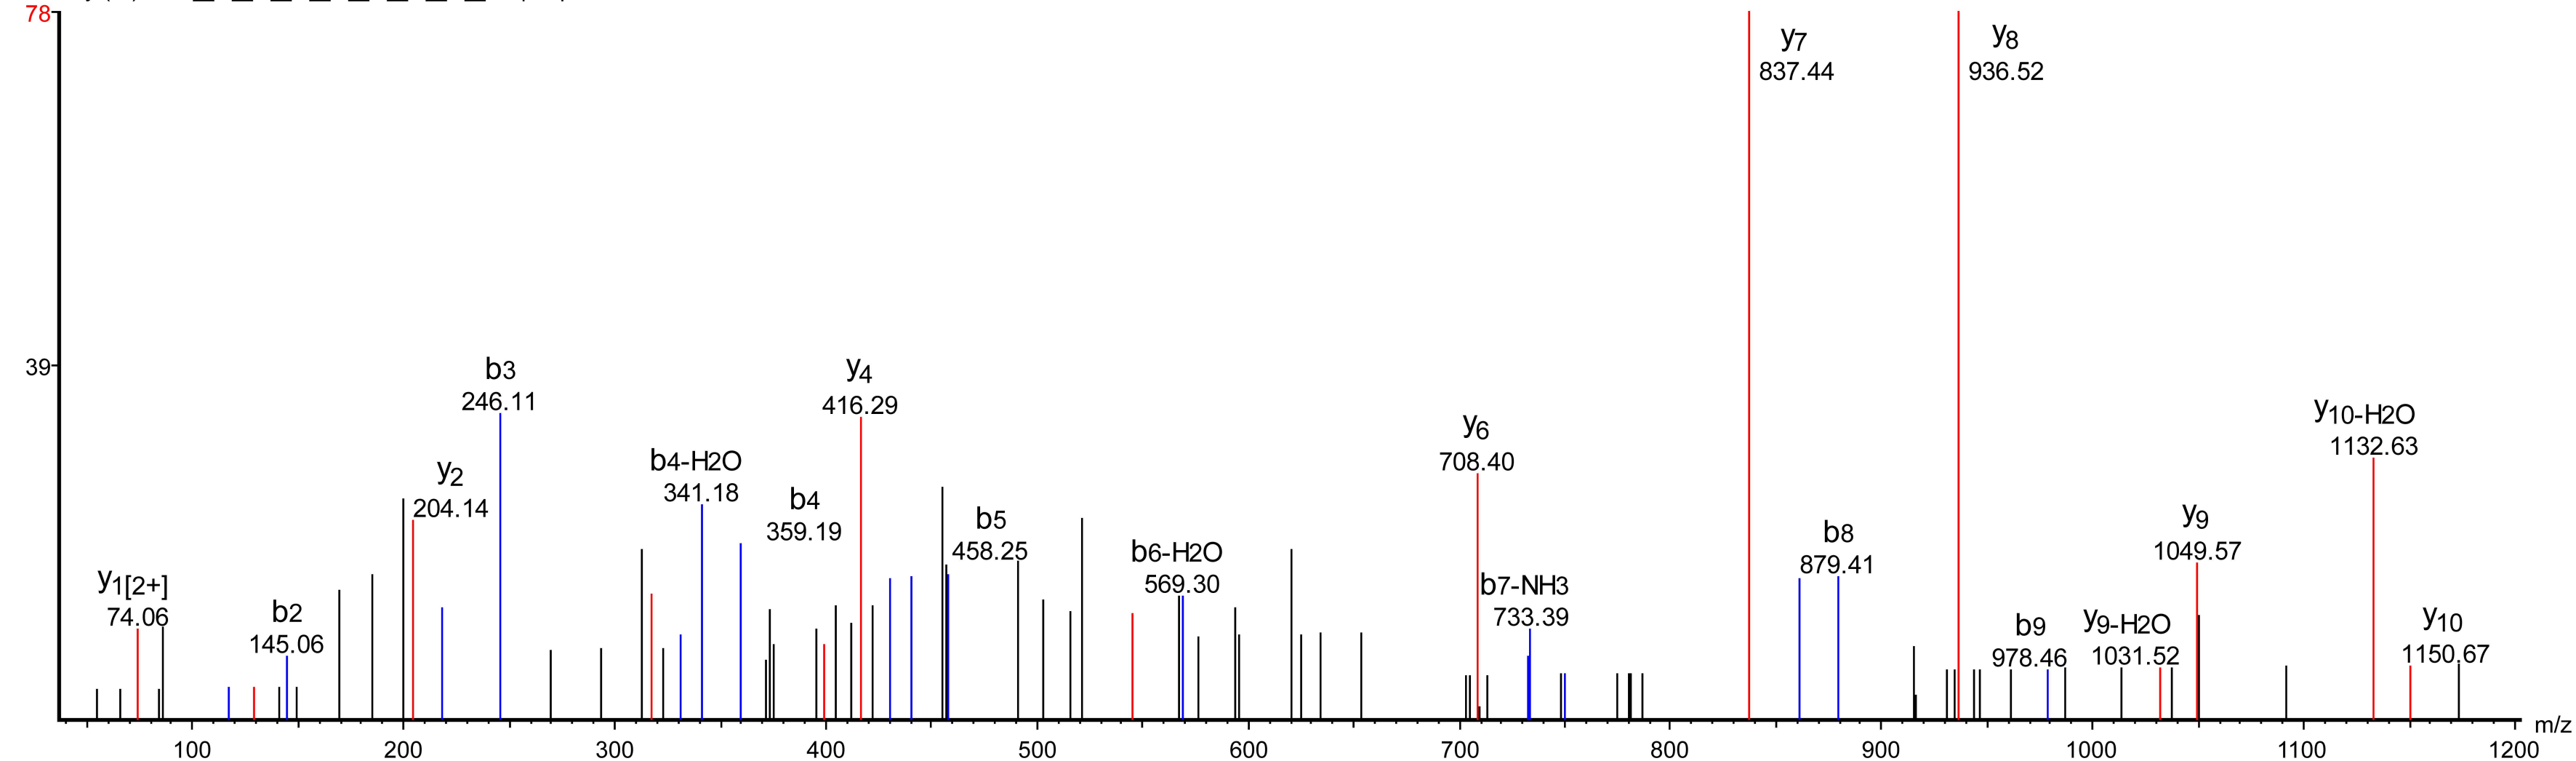

Smp\_202190.1\_1

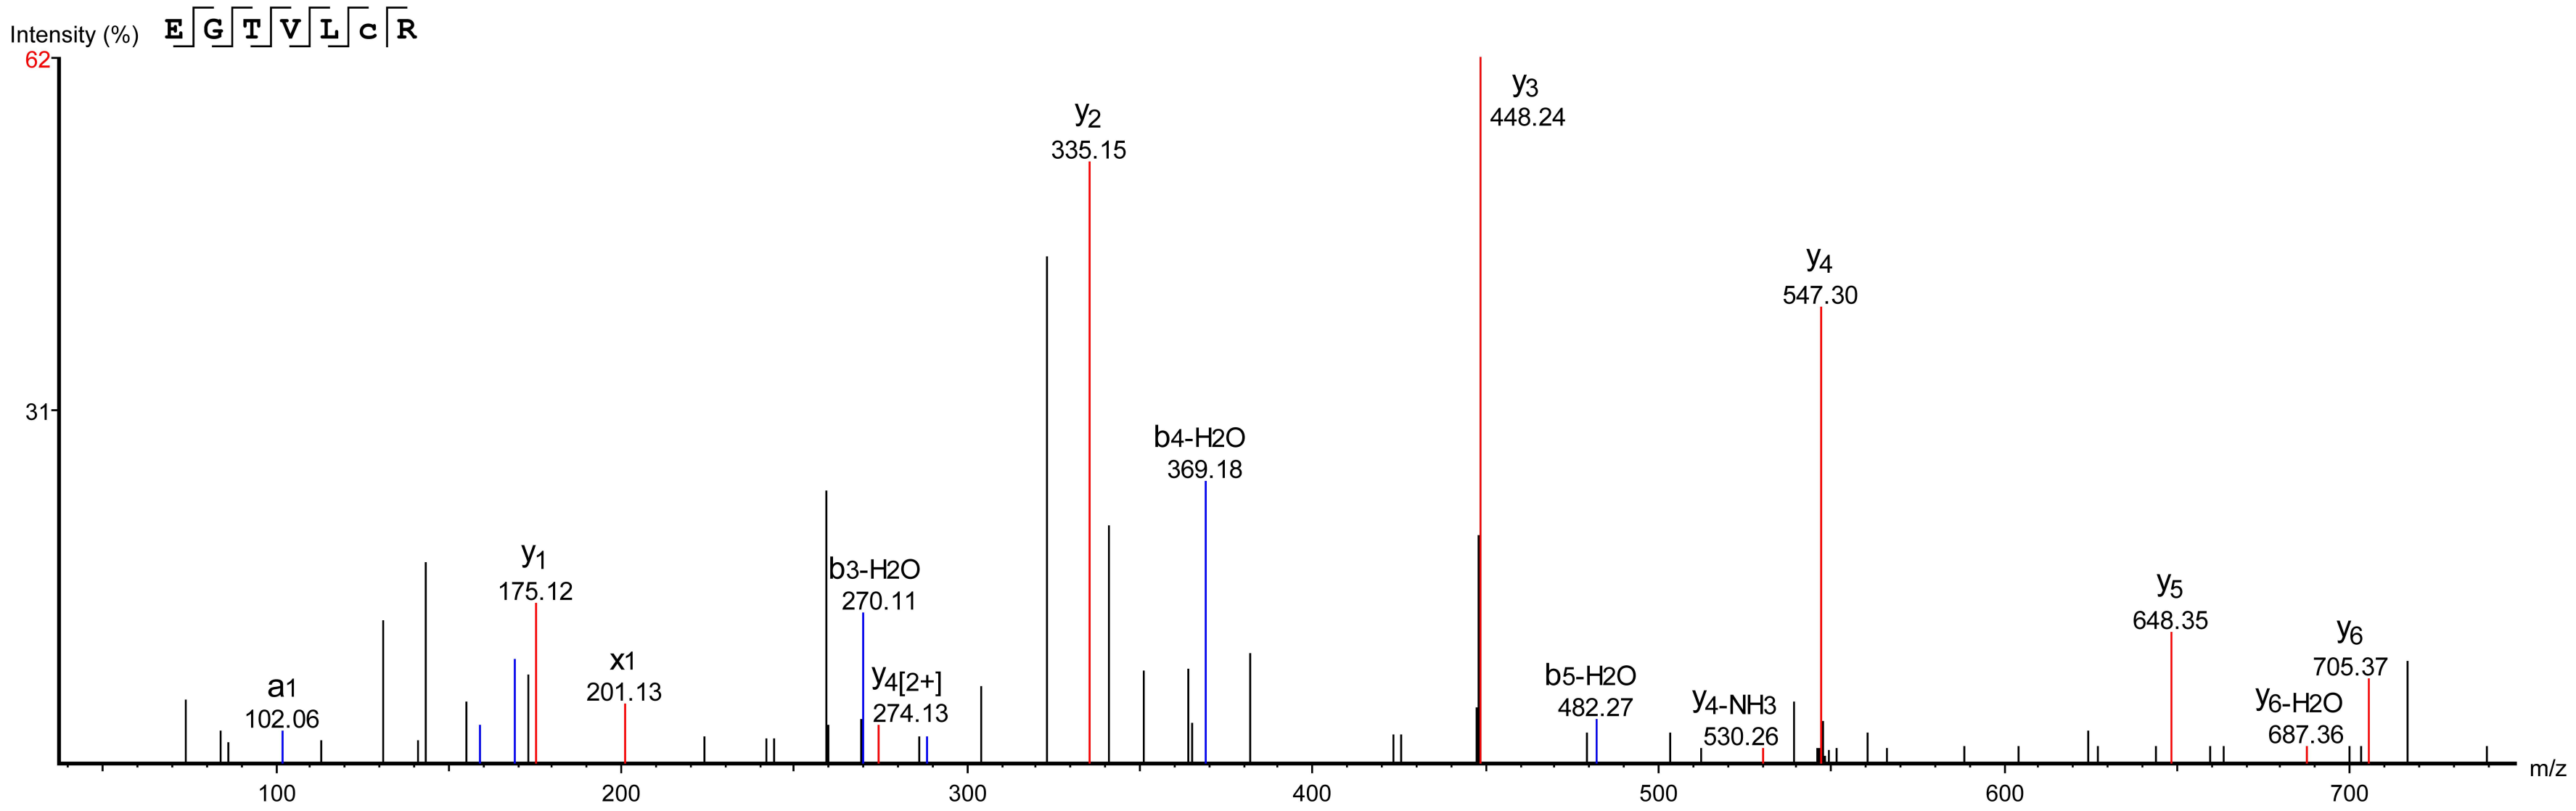

Smp\_202190.1\_2

Intensity (%) S Q L S Y R

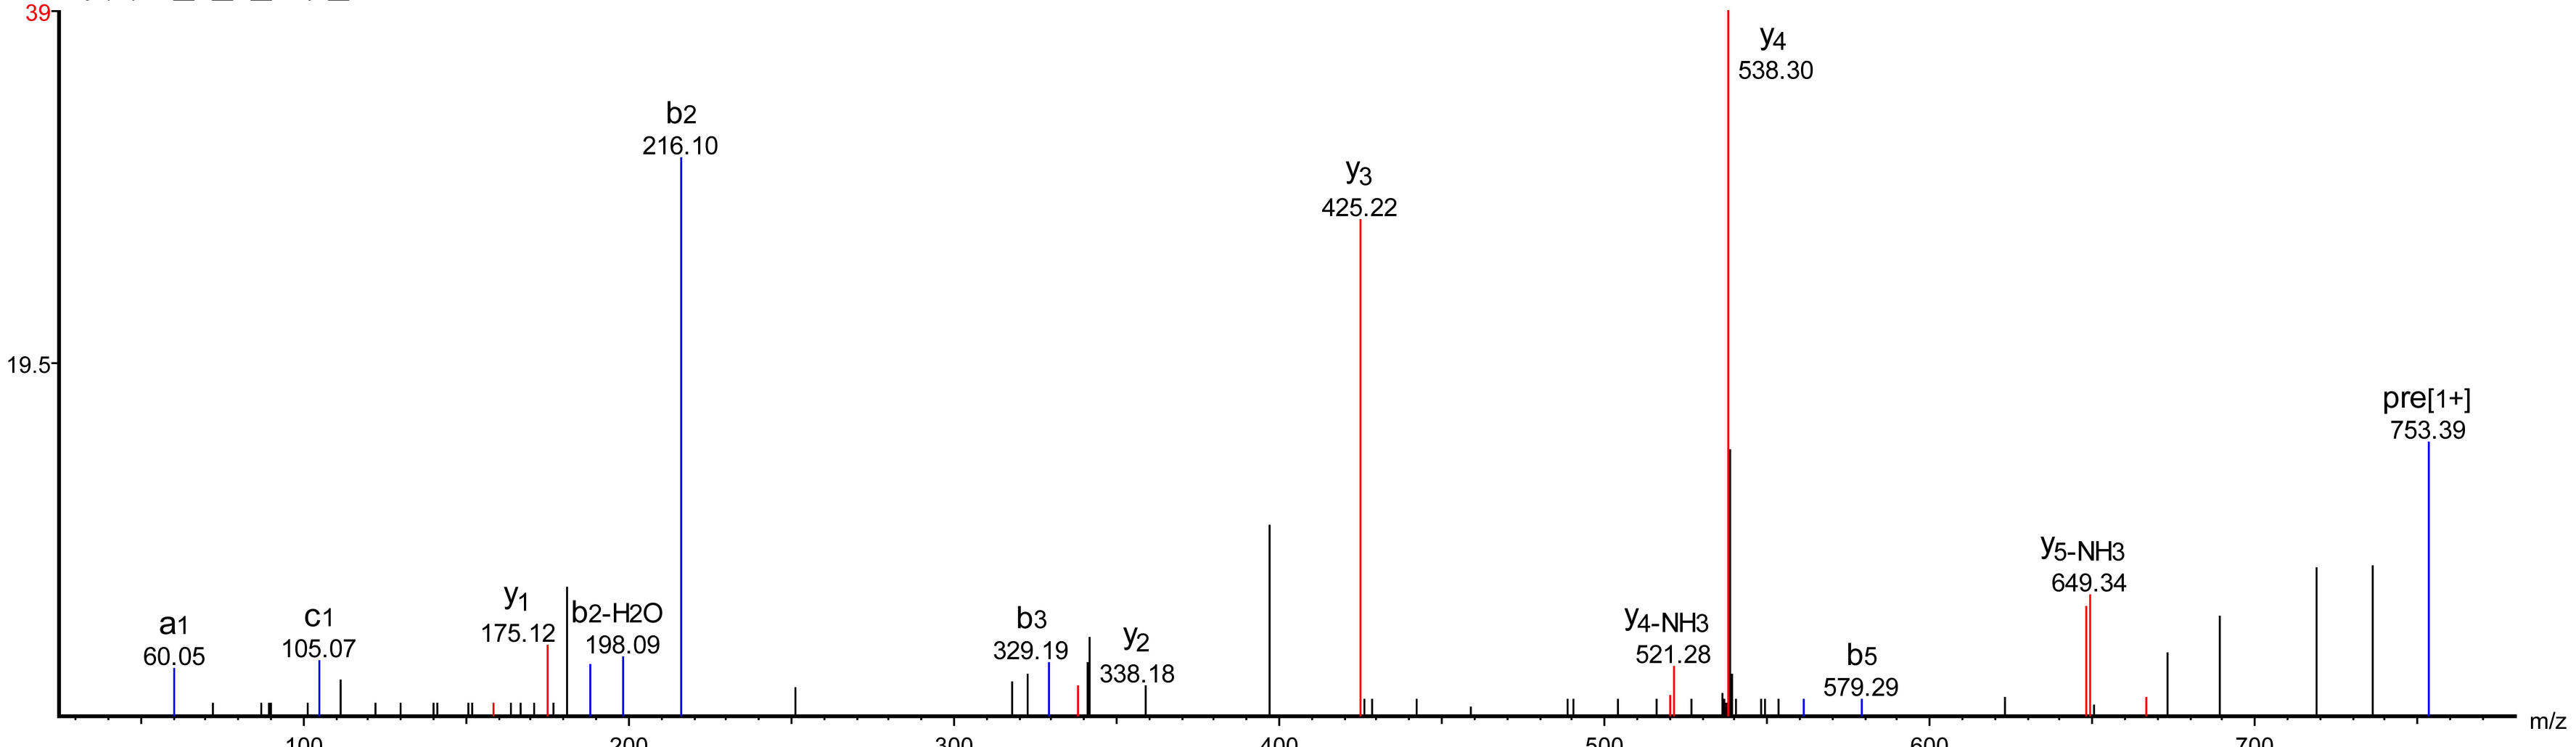

Supplement: 13071_2019_3708_MOESM7_ESM.pdf [file 13071_2019_3708_MOESM7_ESM.pdf]
